# Supplementary material for: Metabolomic analysis of primary human skeletal muscle cells during myogenic progression
Source: PubMed Central journal article supplement (PMC7366914; doi:10.1038/s41598-020-68796-4), 2020-07-16
Supplement: 41598_2020_68796_MOESM1_ESM.pdf [file 41598_2020_68796_MOESM1_ESM.pdf]

## **Metabolomic analysis of primary human skeletal muscle cells during myogenic progression**

**Ashok Kumar<sup>1</sup>, Yashwant Kumar<sup>1</sup>, Jayesh Kumar Sevak<sup>1</sup>, Sonu Kumar<sup>1</sup>, Niraj Kumar<sup>1\*</sup>, and Suchitra Devi Gopinath<sup>1\*</sup>**

### **Supplementary information**

#### **Supplementary Legends and Table**

#### **Supplementary Figure 1**

(A) Relative mRNA levels of MyoD, Myogenin, and MyHC in proliferating hSkMcs, early and late differentiating cultures. Gene expression levels of individual genes were normalized to GAPDH. (B) PCA analysis of the metabolomics datasets from proliferating (Day 0) and differentiating cultures (Day 2 and Day 4) were performed using the MetaboAnalyst 4.0 (n=3 per sample). Plot of Day-0 (Red Pink circle) and Day-2 and Day-4 (Green and Blue) metabolites are clearly distinguished on the PC2 axis (Y-axis). (C) PLSDA cross validation plot with accuracy of around 45%, R2 90% and Q2 56%.

#### **Supplementary Figure 2**

A heat map comparing the metabolites changes during the course of differentiation of primary human myoblasts at 3 different time points (Day-0, Day-2 and Day-4). R1, R2, and R3 indicate the replicates for each sample. Distinct pattern changes between Day 0 versus Day 2 and 4 indicate a clear separation in metabolite pattern during myogenic progression from proliferation to differentiation. Red indicates that the relative contents of metabolites are high whereas blue indicates that the relative content of metabolites are low.

### **Supplementary Figure 3**

Total ion chromatograms of one of the representative sample from HILIC, Reverse phase, positive and negative mode.

### **Supplementary Figure 4**

EIC of GSSG with a retention time of 8.3 using HILIC negative mode

# Supplementary Figure 1

**A**

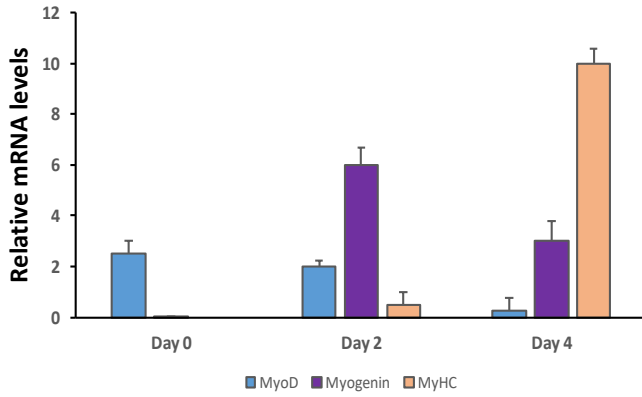

**B**

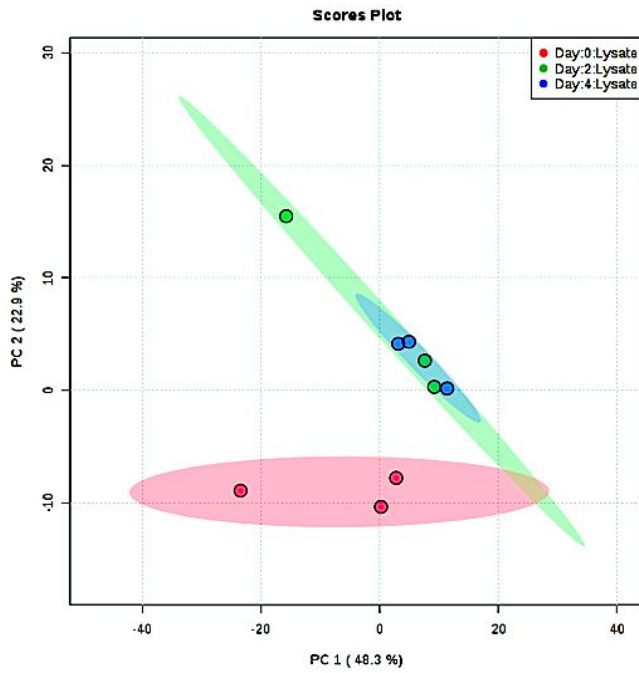

**C**

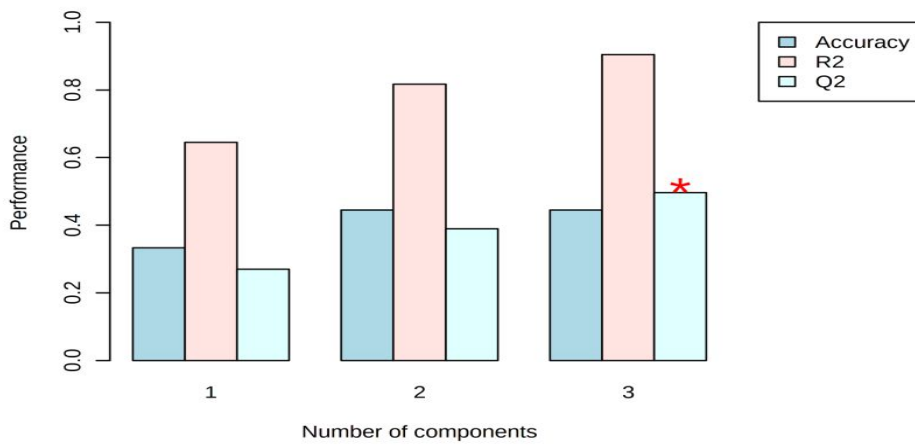

# Supplementary Figure 2

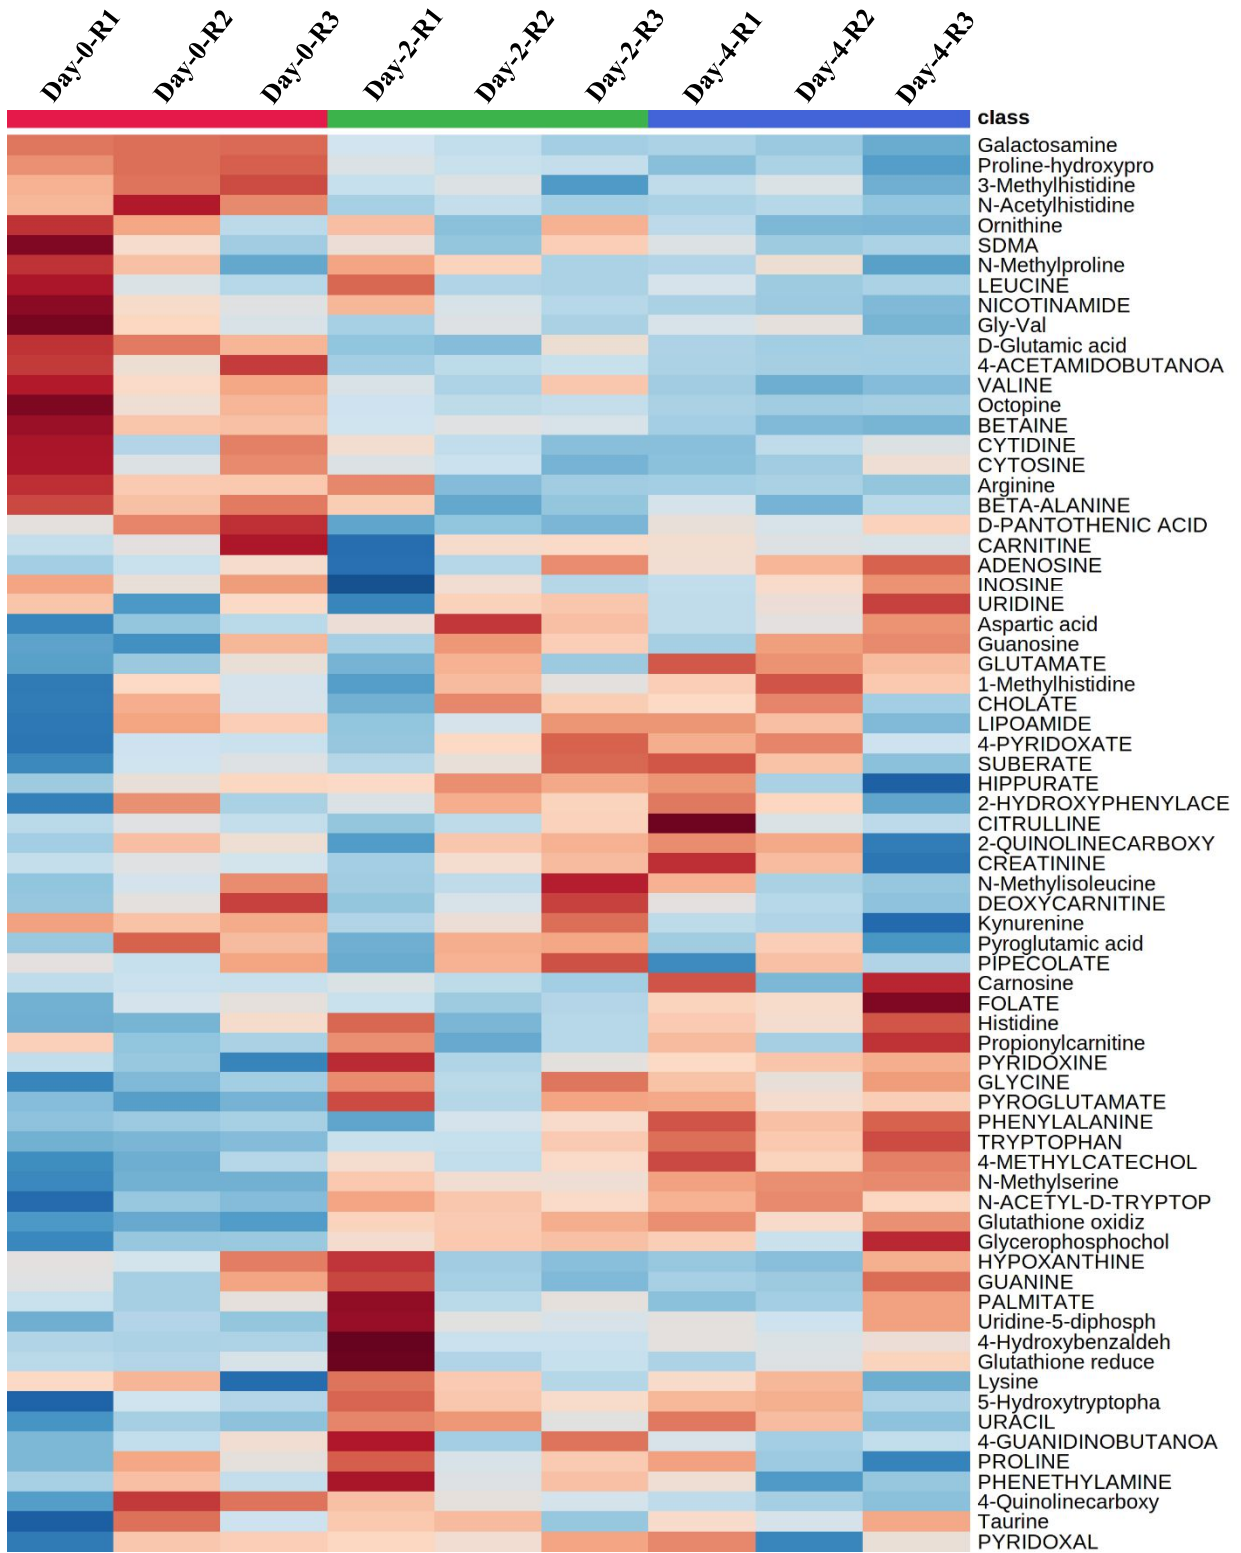

### Supplementary Figure 3

HILIC\_NEG\_TIC

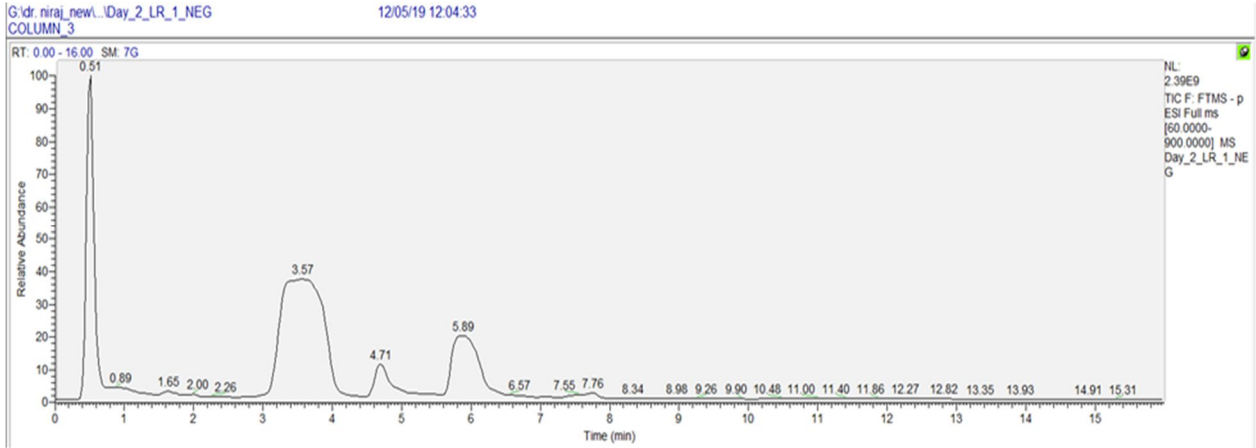

HILIC\_POS\_TIC

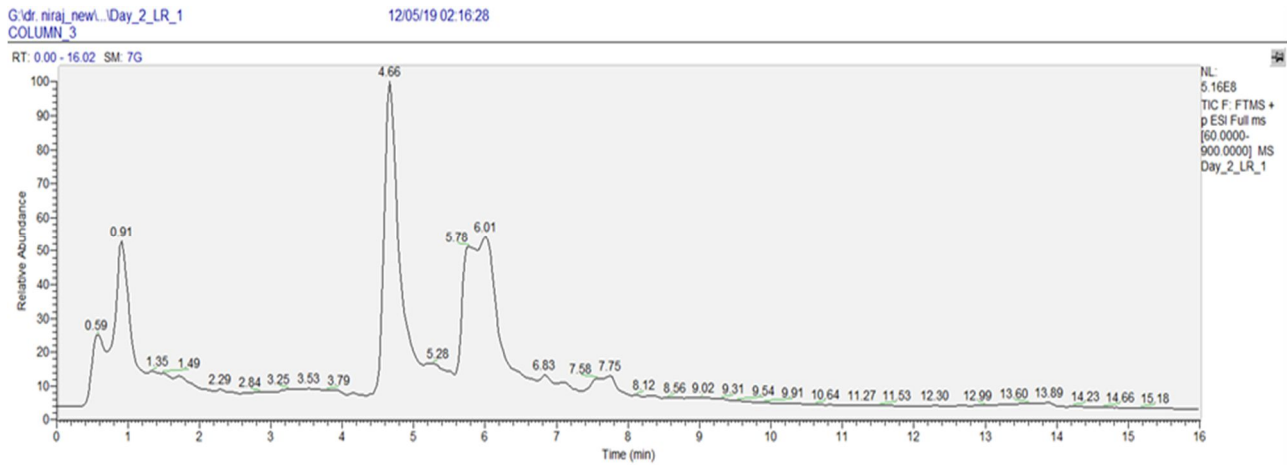

# RP\_NEG\_TIC

G:\dr\_niraj\_newl...Day\_0\_LR\_1\_NEG  
COLUMN\_3

11/15/19 13:18:49

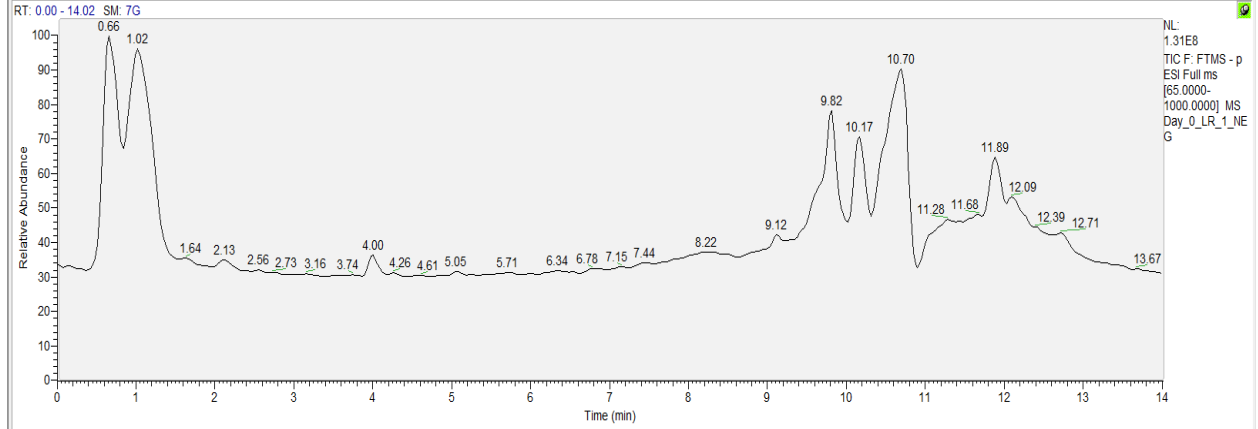

# RP\_POS\_TIC

G:\dr\_niraj\_newl...Day\_2\_LR\_1  
COLUMN\_3

11/14/19 23:57:20

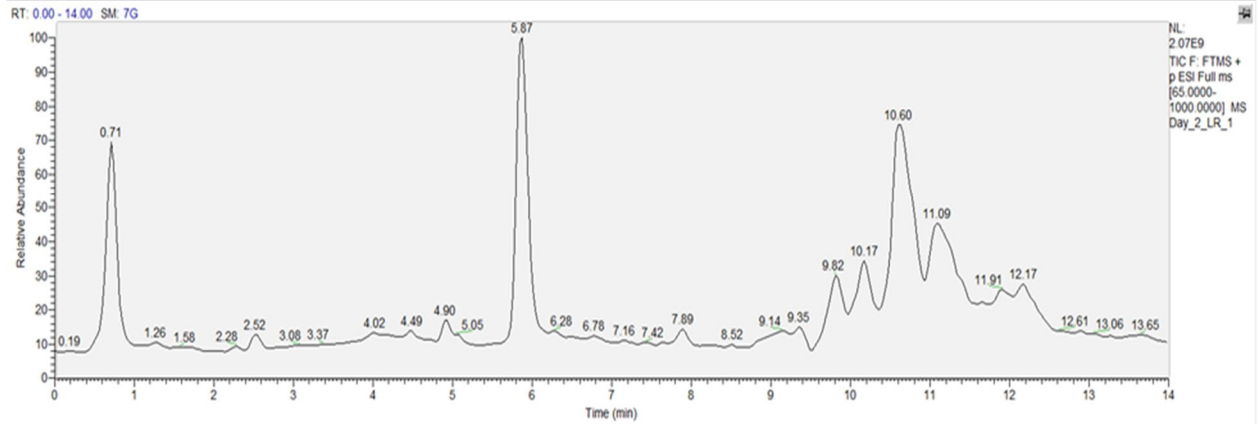

# Supplementary Figure 4

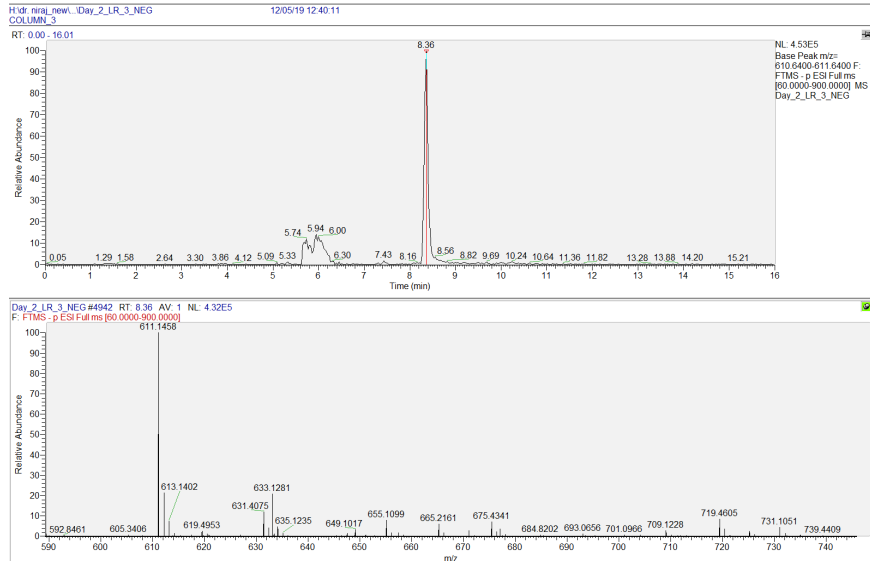

**Supplementary Table-1: Metabolomics data matrices.**

| Accepted Description       | Day 0 LR 1   | Day 0 LR 2   | Day 0 LR 3   | Day 2 LR 1   | Day 2 LR 2   | Day 2 LR 3    | Day 4 LR 1   | Day 4 LR 2    | Day 4 LR 3    |
|----------------------------|--------------|--------------|--------------|--------------|--------------|---------------|--------------|---------------|---------------|
| Samples                    | Day:0:Lysate | Day:0:Lysate | Day:0:Lysate | Day:2:Lysate | Day:2:Lysate | Day: 2:Lysate | Day:4:Lysate | Day: 4:Lysate | Day: 4:Lysate |
| 3-Methylhistidine          | 400.724225   | 333.0186895  | 354.8054464  | 212.8900124  | 200.3825197  | 142.8231979   | 181.1872728  | 195.3802023   | 176.0374823   |
| 4-Hydroxybenzaldehyde      | 18.37841648  | 6.067925048  | 8.222282469  | 725.1367967  | 58.67832452  | 63.25572395   | 119.8417417  | 92.93508625   | 162.2528355   |
| 4-Quinolinecarboxylic acid | 97.94990611  | 301.1242846  | 266.5496669  | 198.2109733  | 139.8368351  | 131.2174573   | 111.3873012  | 97.02832305   | 99.83357978   |
| 5-Hydroxytryptophan        | 1381.184498  | 1596.286275  | 1515.217932  | 2002.169099  | 1523.279537  | 1507.619008   | 1536.633195  | 1558.012609   | 1441.548933   |
| Arginine                   | 14309.17099  | 6880.671027  | 6955.385402  | 8062.736032  | 2451.841219  | 3125.606593   | 3012.86588   | 3108.346499   | 3200.655065   |
| Aspartic acid              | 25.52147634  | 45.03737926  | 57.63493323  | 72.0914627   | 111.9377272  | 81.67039073   | 48.087973    | 58.73429068   | 105.946046    |
| Carnosine                  | 339.2096181  | 296.4822736  | 286.0275183  | 347.1374673  | 197.5199601  | 122.6914324   | 876.2717403  | 9.138337374   | 1200.679156   |
| Galactosamine              | 877.0294536  | 661.7342285  | 671.0530529  | 359.2936857  | 296.1465477  | 265.2029964   | 261.685821   | 236.8864169   | 222.7820846   |
| Glutamic acid              | 4391.222289  | 3237.108515  | 4450.457521  | 4525.542721  | 3834.839649  | 3181.53492    | 4352.399165  | 4059.234834   | 6179.589747   |
| Glutathione (oxidized)     | 2984.599905  | 4877.500262  | 2891.685992  | 22718.74607  | 20972.89806  | 25269.42093   | 26715.21599  | 18227.11623   | 31599.26951   |
| Glutathione (reduced)      | 509.6171101  | 187.6433201  | 1201.774957  | 7937.759676  | 117.3454442  | 581.3013823   | 76.21778158  | 1122.16065    | 2538.144166   |
| Gly-Val                    | 285.0077046  | 108.5788705  | 85.37206065  | 57.29950715  | 72.32324076  | 53.29833213   | 67.57945186  | 74.72045275   | 41.16883161   |
| Histidine                  | 623.8660532  | 488.5532894  | 960.5361276  | 1305.23985   | 412.1682857  | 592.3919398   | 850.1420112  | 761.7273377   | 1403.211252   |
| Kynurenine                 | 334.1241684  | 234.0769091  | 244.9152237  | 175.1614282  | 176.243558   | 227.9757415   | 155.3198195  | 151.3528932   | 126.3908781   |
| Lysine                     | 1084.937758  | 883.2106896  | 361.881903   | 932.1537396  | 690.317307   | 546.9302789   | 639.4178155  | 706.1725463   | 499.8292456   |
| N-Acetylhistidine          | 200.3924968  | 277.7039715  | 190.4867117  | 21.1115405   | 39.67537475  | 16.38198471   | 20.54403823  | 28.51171541   | 3.520582437   |
| 1-Methylhistidine          | 445.3182149  | 622.8453307  | 550.1851988  | 369.7354646  | 549.0585757  | 492.5396528   | 514.2815719  | 642.4721125   | 623.2196314   |
| N-Methylisoleucine         | 16.20035619  | 492.6020129  | 1497.270754  | 122.9556465  | 277.6058559  | 1869.1839     | 987.4903222  | 155.4295391   | 41.66494703   |
| N-Methylproline            | 938.7428732  | 499.1313592  | 216.1923532  | 507.5697667  | 381.1589578  | 264.3783459   | 255.6576448  | 340.779643    | 193.5575885   |
| N-Methylserine             | 152.0224457  | 160.1800631  | 159.7586874  | 286.6155021  | 226.4782784  | 234.9162951   | 278.8110083  | 291.2046936   | 352.4399657   |
| Octopine                   | 281.7202152  | 64.73752135  | 101.2317286  | 34.70470102  | 22.71486929  | 27.25435883   | 13.41975415  | 8.786487509   | 12.81860358   |
| Ornithine                  | 384.4285182  | 197.0524491  | 78.37407494  | 163.6849489  | 32.31937027  | 160.6378494   | 62.66794813  | 24.72981174   | 27.25183324   |



|                                      |             |             |             |             |             |             |             |             |             |
|--------------------------------------|-------------|-------------|-------------|-------------|-------------|-------------|-------------|-------------|-------------|
| Proline-hydroxyproline               | 3556.027665 | 2771.631333 | 2832.319433 | 1986.110328 | 1673.941468 | 1730.133215 | 1442.682233 | 1548.347592 | 1568.56843  |
| Propionylcarnitine                   | 1661.842878 | 538.8093598 | 662.8899565 | 1496.382293 | 305.2174858 | 628.0526665 | 1102.642845 | 512.679592  | 1942.41749  |
| Pyroglutamic acid                    | 100.1006258 | 163.21636   | 132.287034  | 57.16152577 | 112.4044713 | 119.7749039 | 62.08688045 | 98.96100444 | 48.08432192 |
| SDMA                                 | 318.8783701 | 94.22605424 | 34.12836909 | 79.3966588  | 21.17396883 | 92.43676043 | 57.72635841 | 26.10349274 | 38.2656285  |
| Taurine                              | 11214.04623 | 14908.26949 | 11828.0303  | 12446.82182 | 11185.03554 | 9288.065729 | 10345.40219 | 9646.755717 | 13441.90182 |
| Uridine-5-diphosphoacetylglucosamine | 1901.679226 | 7991.789663 | 4650.909549 | 39133.04494 | 11492.20725 | 10795.85235 | 11712.83869 | 8954.683363 | 24750.45328 |
| Beta-alanine                         | 207.0133653 | 114.5117631 | 139.445689  | 102.7744279 | 40.79261334 | 53.13403094 | 69.10488174 | 43.30111128 | 72.23482859 |
| Glycine                              | 209.3990189 | 329.7188712 | 412.5213633 | 849.8603113 | 383.8905964 | 825.6283408 | 614.6295997 | 498.1858379 | 840.7471111 |
| Palmitate                            | 423.7109348 | 206.1394417 | 440.1949971 | 1143.412888 | 222.5175506 | 374.0186663 | 104.6679628 | 157.5507551 | 719.2376609 |
| Cholate                              | 213515.1134 | 313897.4281 | 254887.7721 | 186200.1355 | 274746.0158 | 251519.3518 | 229606.3552 | 270284.6536 | 214835.5433 |
| Glycerophosphocholine                | 2711.780356 | 8300.177026 | 8569.901684 | 15261.19272 | 15596.07098 | 16791.00882 | 14882.39006 | 9914.214124 | 29420.47145 |
| Glutamate                            | 1973.434124 | 1590.092491 | 1807.084554 | 1417.350011 | 1612.519325 | 1366.731818 | 1736.283486 | 1639.063406 | 1862.176627 |
| 2-Quinolinecarboxylic acid           | 827.3022575 | 774.9023857 | 719.6258357 | 499.8994055 | 627.8190298 | 680.2165966 | 673.2279005 | 645.7330828 | 471.6221786 |
| 4-Guanidinobutanoate                 | 244.4659996 | 398.4163628 | 600.4269571 | 1191.126683 | 240.9732418 | 858.3407054 | 383.0137386 | 236.2894545 | 385.105423  |
| 4-Pyridoxate                         | 378.5446129 | 494.5432158 | 492.8691769 | 392.5494366 | 478.0967041 | 635.4637833 | 521.61866   | 563.863137  | 475.4406853 |
| Creatinine                           | 11140.23434 | 8528.69356  | 8440.378226 | 7520.211031 | 7157.842482 | 7748.383166 | 8024.367067 | 7272.196593 | 6973.2367   |
| Deoxycarnitine                       | 2303.285317 | 6075.925129 | 15690.71506 | 1510.307167 | 4228.48748  | 13297.47769 | 4851.368978 | 2698.33444  | 1324.894146 |
| D-pantothenic acid                   | 57695.69104 | 59799.66013 | 70215.83149 | 23849.24516 | 25496.42698 | 24424.55802 | 35403.45842 | 32690.87129 | 47020.59325 |
| Guanosine                            | 26861.23505 | 19482.30612 | 25299.73176 | 20158.0604  | 21350.14754 | 21015.9218  | 17328.91035 | 20782.05451 | 25325.90428 |
| Hippurate                            | 5586.641067 | 4718.074635 | 4937.740524 | 4550.143243 | 4461.488245 | 4510.065697 | 4348.480697 | 3399.827167 | 3090.357337 |
| Hypoxanthine                         | 35162.60245 | 24105.55578 | 39754.56486 | 42889.6319  | 15540.83446 | 14398.17219 | 14536.6582  | 13518.9498  | 33497.11535 |
| Carnitine                            | 4658.327351 | 4016.717366 | 7471.237014 | 942.1477829 | 3636.460916 | 3886.953558 | 3498.914377 | 3145.93789  | 3678.662404 |
| Leucine                              | 425495.483  | 202654.0376 | 184423.3645 | 261823.7472 | 147778.5392 | 152767.6278 | 160649.235  | 138285.8771 | 171097.8359 |
| Proline                              | 27097.89212 | 24653.66985 | 22737.77713 | 24438.11218 | 18195.84762 | 20356.60321 | 19954.6199  | 16718.51514 | 17928.94261 |
| Valine                               | 65738.56839 | 33191.0299  | 38358.56552 | 27196.4081  | 20825.07925 | 30270.042   | 19571.80863 | 16685.02545 | 21309.57912 |
| N-Acetyl-D-Tryptophan                | 123.0062656 | 265.1156595 | 242.7324893 | 481.7485977 | 380.8519727 | 366.7517982 | 401.1034469 | 447.0977506 | 422.2694551 |

|                        |             |             |             |             |             |             |             |             |             |
|------------------------|-------------|-------------|-------------|-------------|-------------|-------------|-------------|-------------|-------------|
| Nicotinamide           | 110093.3282 | 43588.26787 | 38018.66993 | 47953.22432 | 29676.56595 | 25730.11523 | 22285.07265 | 20547.2098  | 20766.64776 |
| Phenethylamine         | 185.2101207 | 202.0758495 | 152.6135836 | 260.9260707 | 136.4066388 | 172.6154868 | 143.702448  | 82.27718204 | 124.7341176 |
| Pipecolate             | 2014.063768 | 1431.657942 | 1694.642196 | 1187.015347 | 1359.835036 | 1564.901904 | 958.5672889 | 1305.281163 | 1335.918327 |
| Pyridoxal              | 1805.25709  | 1549.357752 | 1549.553668 | 1428.382898 | 1244.529697 | 1354.262374 | 1293.226885 | 1091.661693 | 1452.24031  |
| Pyridoxine             | 16755.95656 | 11885.07693 | 10657.43665 | 14901.63224 | 10043.67721 | 11199.58201 | 10918.64877 | 11182.34696 | 13749.59246 |
| Cytidine               | 10129.6891  | 2771.169535 | 5899.642119 | 3785.914149 | 2486.505553 | 1822.243435 | 1689.476874 | 2392.545003 | 3415.471162 |
| Citrulline             | 52.78796067 | 65.95596929 | 46.70648373 | 17.18155493 | 34.53576592 | 81.40937148 | 185.1093801 | 48.97918437 | 39.86711651 |
| Inosine                | 148220.9725 | 92147.55508 | 112574.1272 | 39788.44342 | 77679.16776 | 68351.69365 | 66580.54244 | 77852.41659 | 109396.7806 |
| Cytosine               | 4050.78682  | 1638.581183 | 2413.793984 | 1532.619182 | 1241.68508  | 911.7474035 | 931.6269739 | 1025.609275 | 1729.813555 |
| Uridine                | 19999.64906 | 9234.42479  | 14222.87568 | 7971.33944  | 11855.84001 | 12669.41583 | 9697.803778 | 10881.84571 | 17638.01149 |
| Phenylalanine          | 838.9829588 | 719.5622855 | 805.5441701 | 325.3390943 | 925.0854173 | 1277.488777 | 2030.362467 | 1414.516436 | 2335.085091 |
| Uracil                 | 1209.578105 | 1052.213736 | 1014.91639  | 1323.247797 | 1140.740645 | 1005.966311 | 1161.419892 | 1057.861493 | 972.5819346 |
| Guanine                | 9308.009295 | 5181.637326 | 9665.842743 | 11101.98264 | 4324.62386  | 3703.735383 | 4224.304311 | 4008.014794 | 10610.92346 |
| Folate                 | 10.89202602 | 34.96001331 | 42.0112132  | 29.24775651 | 15.68621941 | 21.10946125 | 43.28869074 | 39.56701767 | 113.4449005 |
| Betaine                | 6390.901521 | 3076.404737 | 3135.578896 | 2113.258913 | 2025.620375 | 2022.835535 | 1491.568832 | 1263.746852 | 1451.849545 |
| Tryptophan             | 206.0804716 | 179.3156128 | 204.8582532 | 454.5633912 | 395.2196114 | 739.7845624 | 1014.563422 | 707.2636299 | 1340.404042 |
| Pyroglutamate          | 45233.22281 | 29131.15599 | 32144.24454 | 61143.09082 | 31712.4687  | 48090.69179 | 44850.55616 | 38379.38521 | 48686.45472 |
| 4-Acetamidobutanoate   | 223.0084377 | 76.23531058 | 165.5569575 | 30.97524963 | 38.48243653 | 45.05211898 | 30.10827248 | 27.80312739 | 32.04345996 |
| Adenosine              | 42387.09258 | 36751.10138 | 45328.61208 | 12699.66001 | 27948.87566 | 50093.74865 | 35648.16845 | 42380.52378 | 61129.56515 |
| 2-Hydroxyphenylacetate | 807.274657  | 1001.634187 | 755.8274644 | 770.0913978 | 789.6459269 | 771.325078  | 830.1019759 | 719.0268183 | 643.0141692 |
| Lipoamide              | 1002.500927 | 1124.570787 | 1065.237377 | 818.4216904 | 797.0605886 | 978.7191671 | 919.5349414 | 871.1759716 | 827.5399257 |
| Suberate               | 1658.342584 | 1942.533706 | 2051.218112 | 1684.570705 | 1745.202409 | 2462.05239  | 2384.926109 | 1937.226924 | 1540.269107 |
| 4-Methylcatechol       | 203.8197906 | 187.7604063 | 246.7151482 | 293.7176981 | 211.3613777 | 276.6223376 | 365.7266195 | 266.6290479 | 394.8797507 |
